# Supplementary material
Source: PubMed Central journal article supplement (PMC4955649)

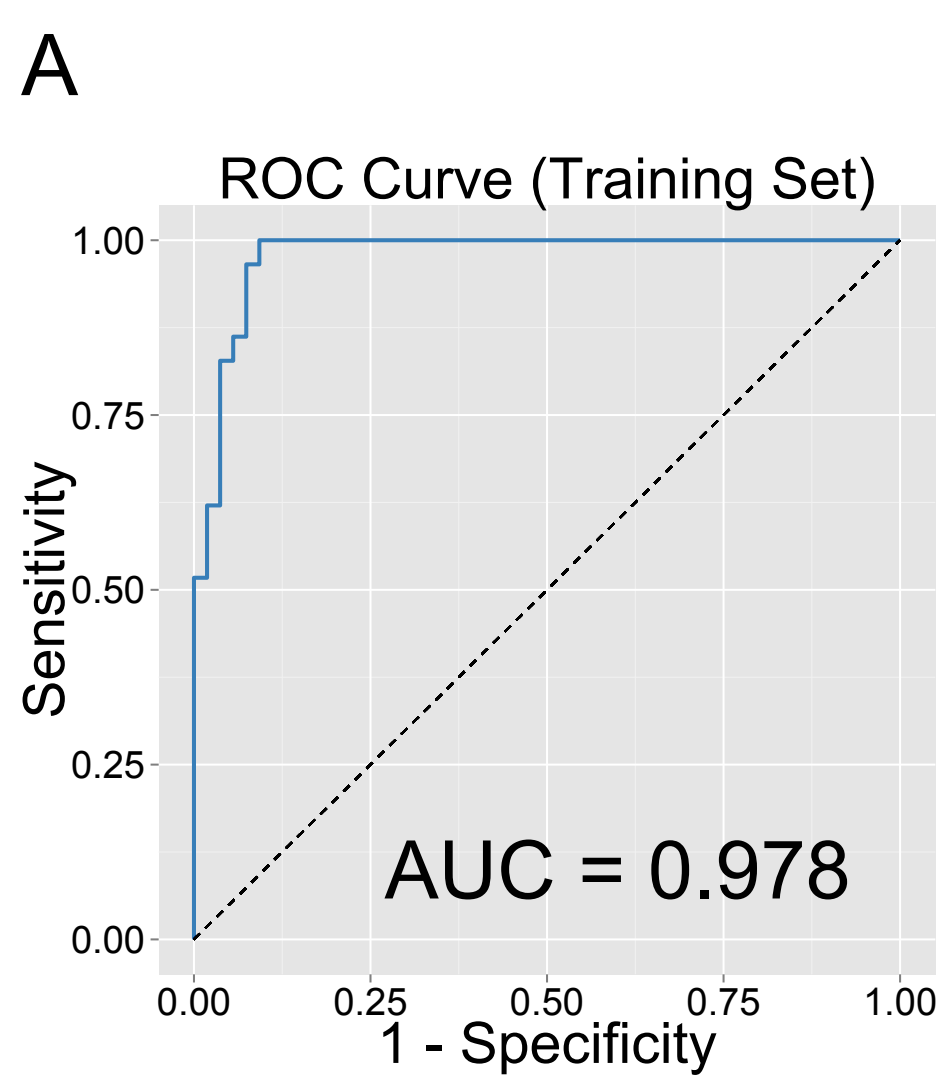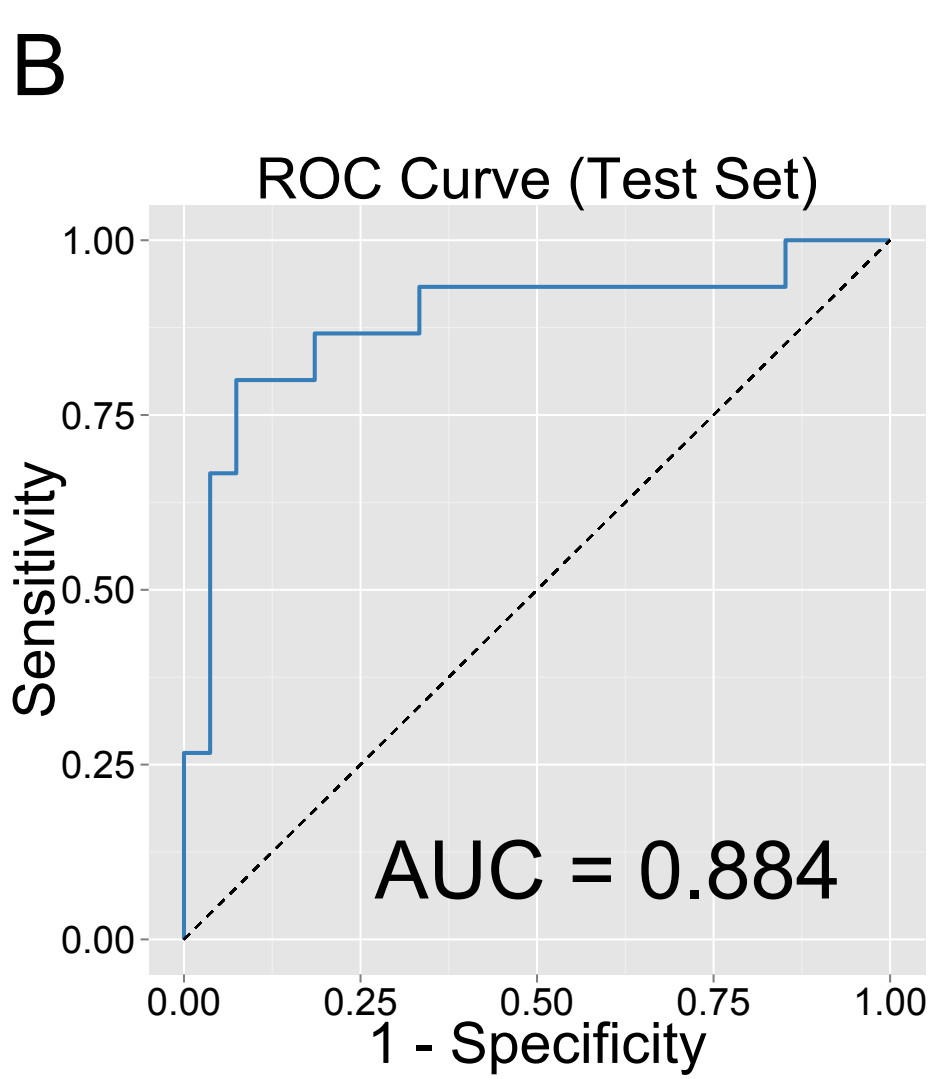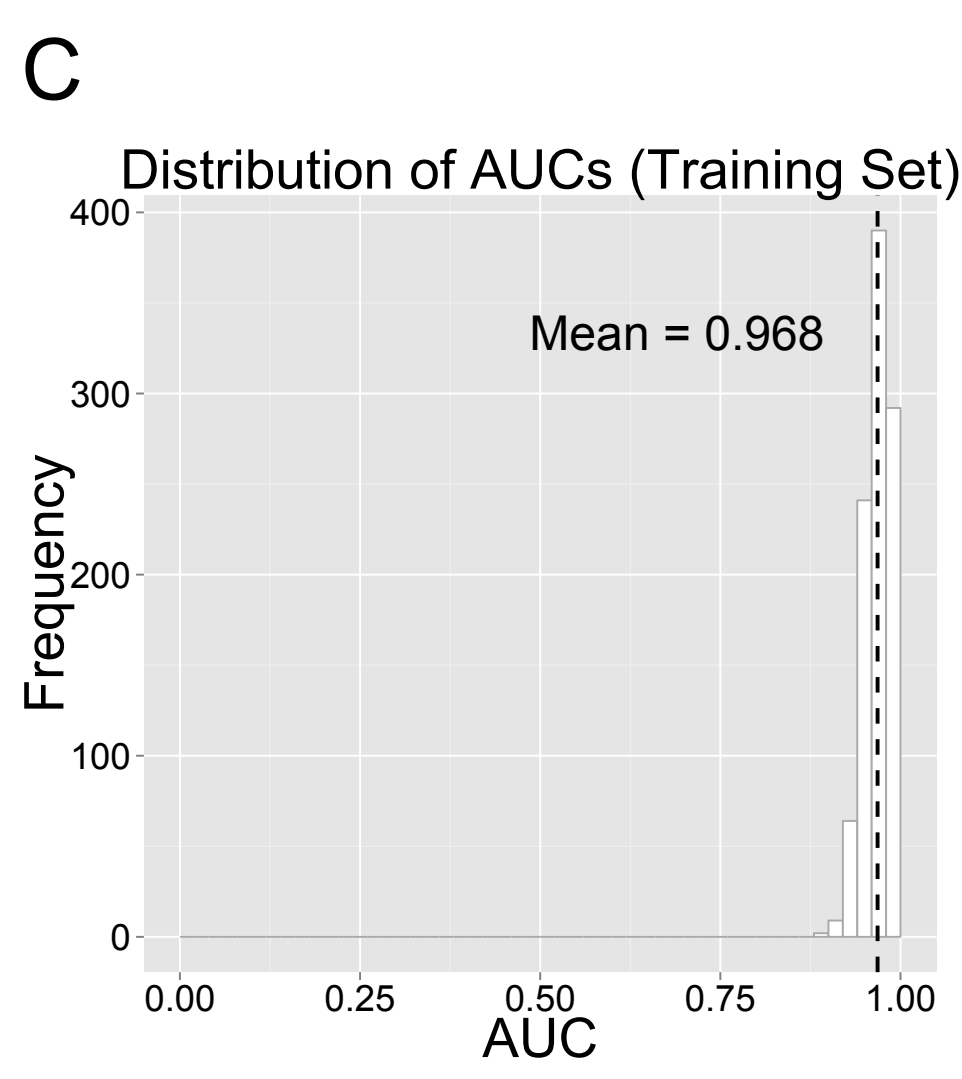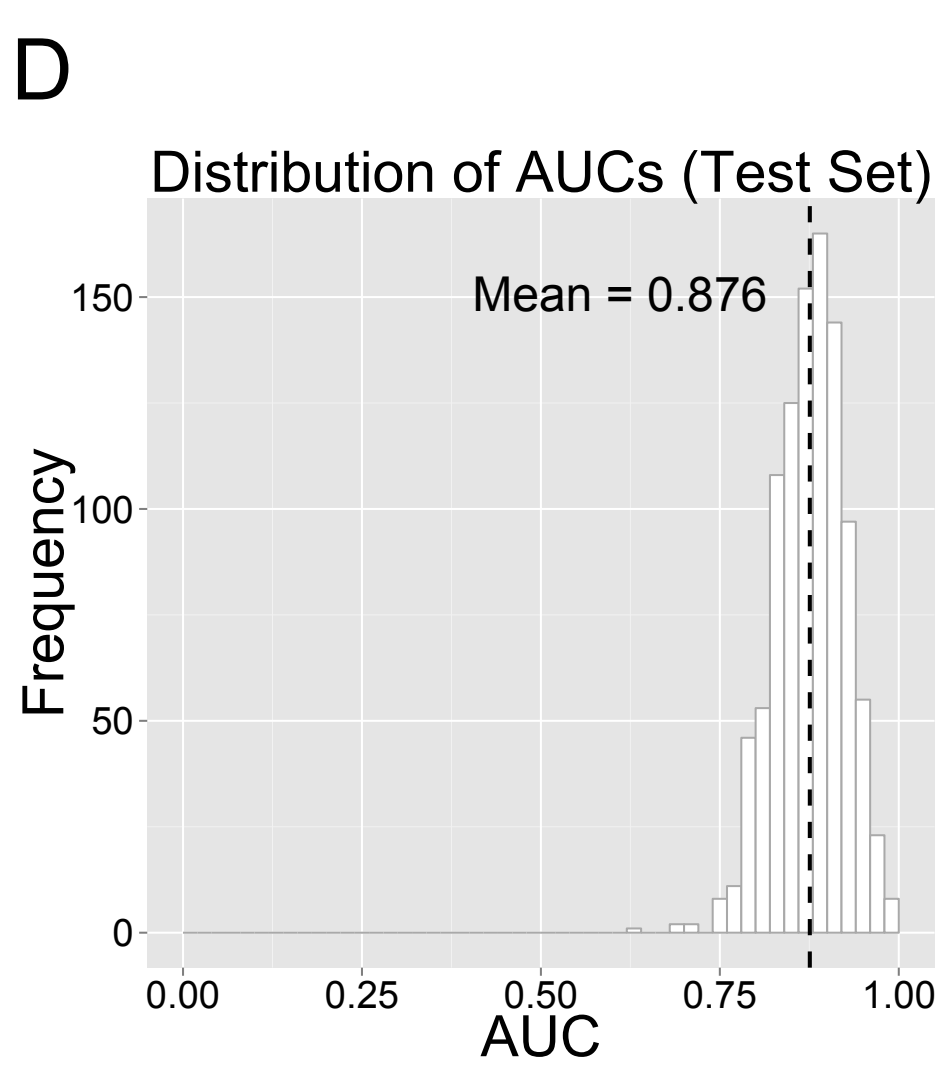

Supplement: NIHMS760424-supplement-1.pdf [file NIHMS760424-supplement-1.pdf]

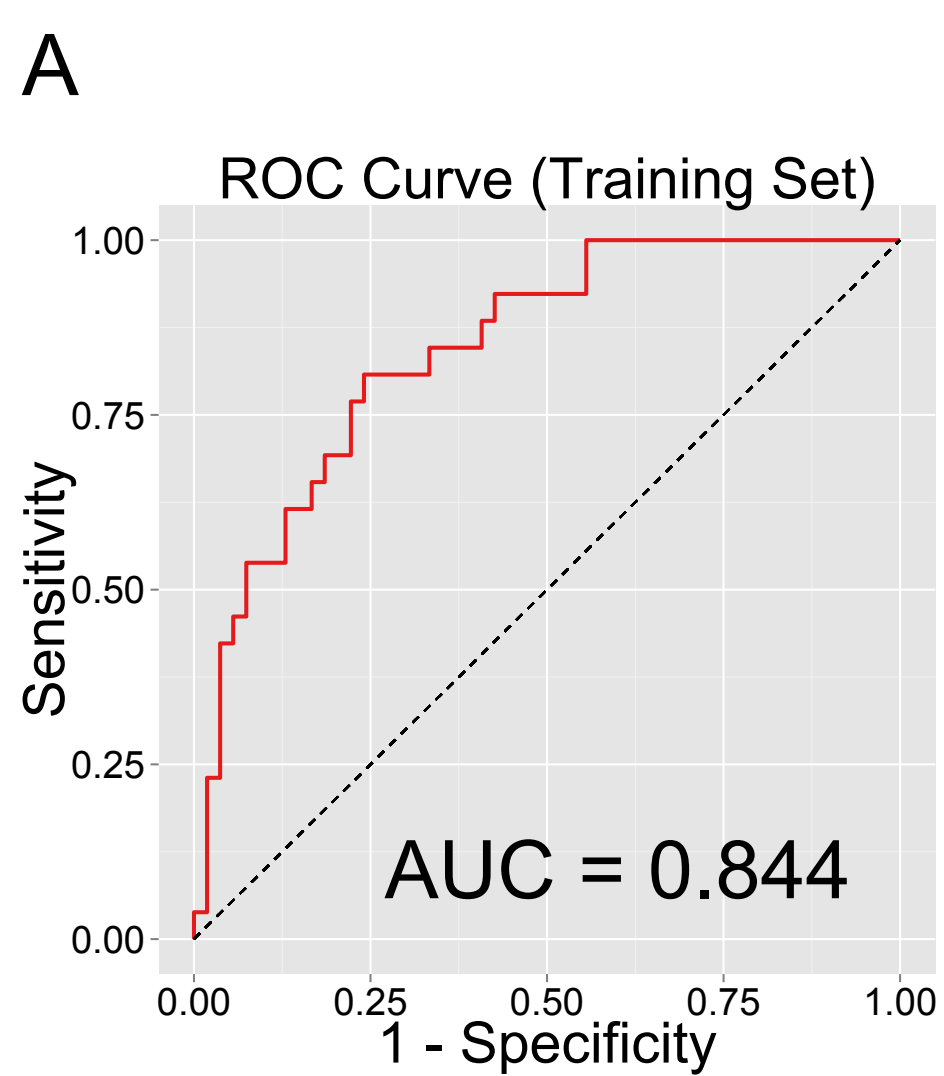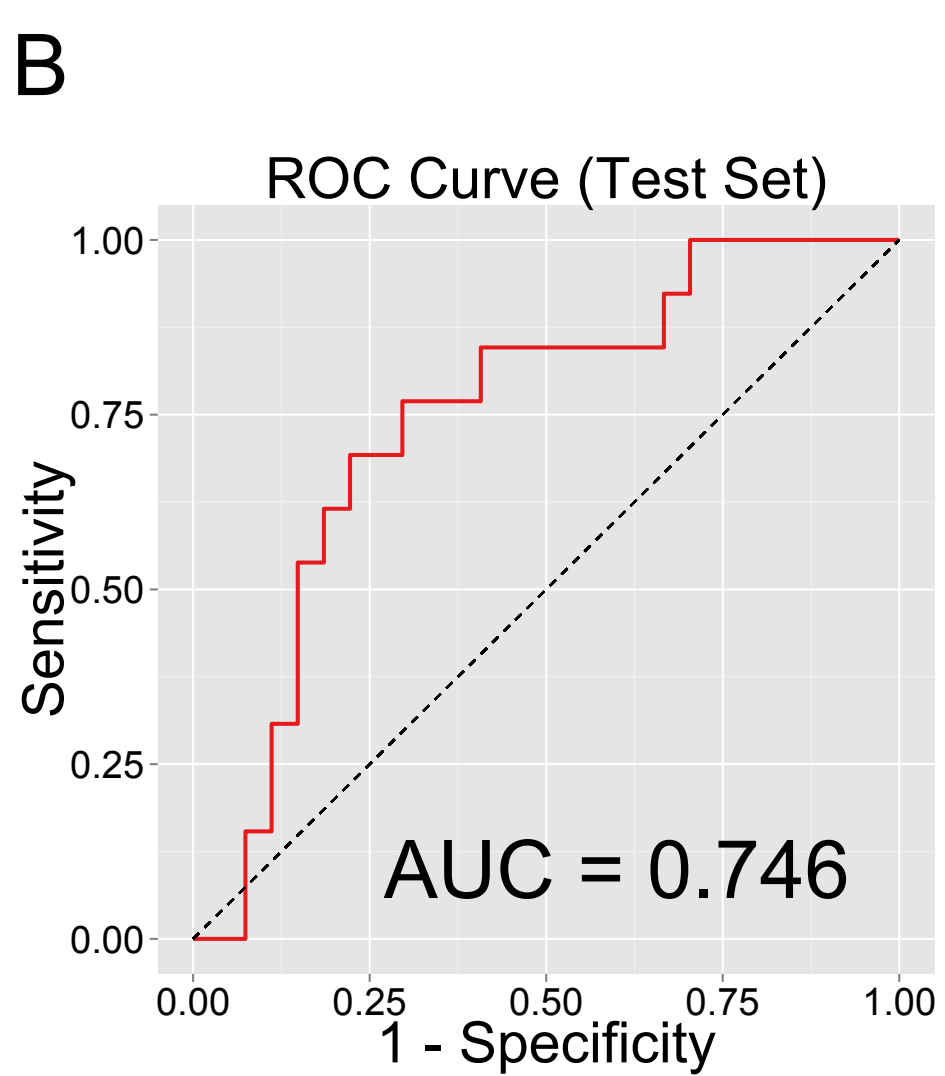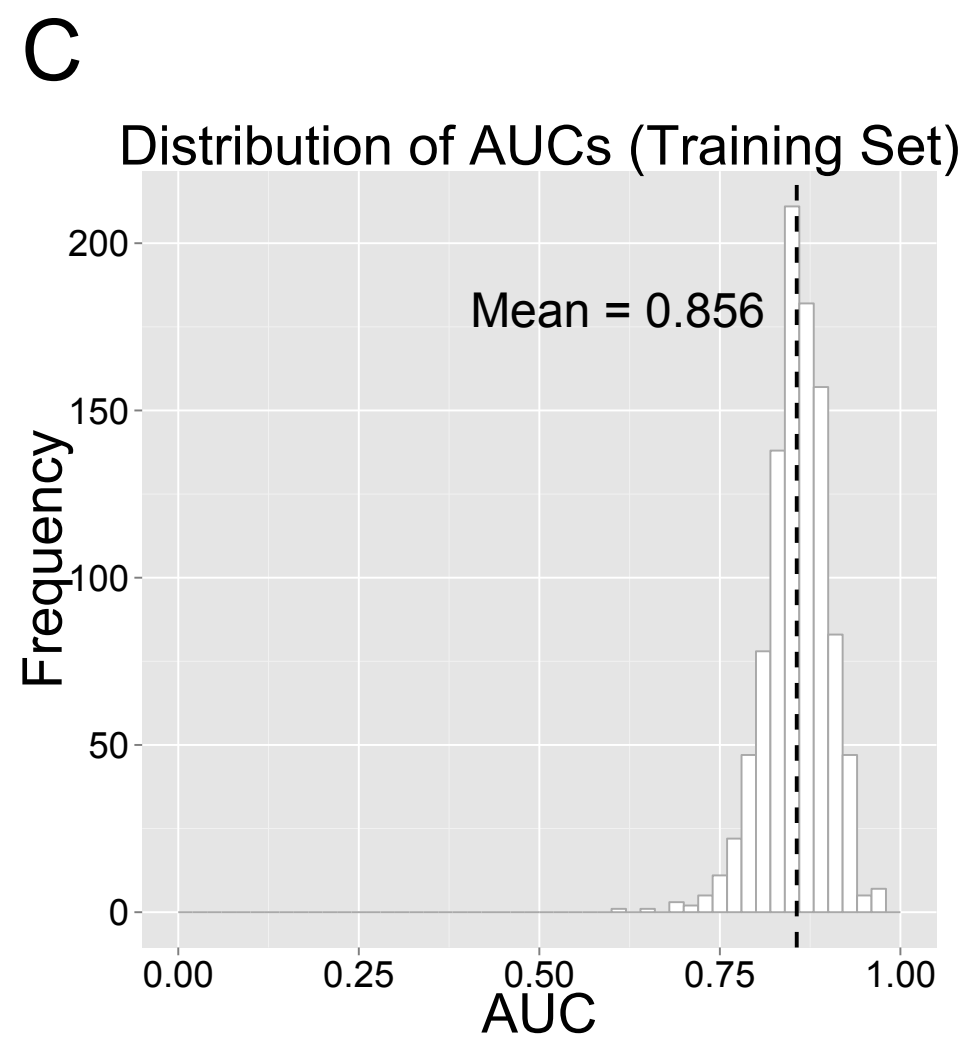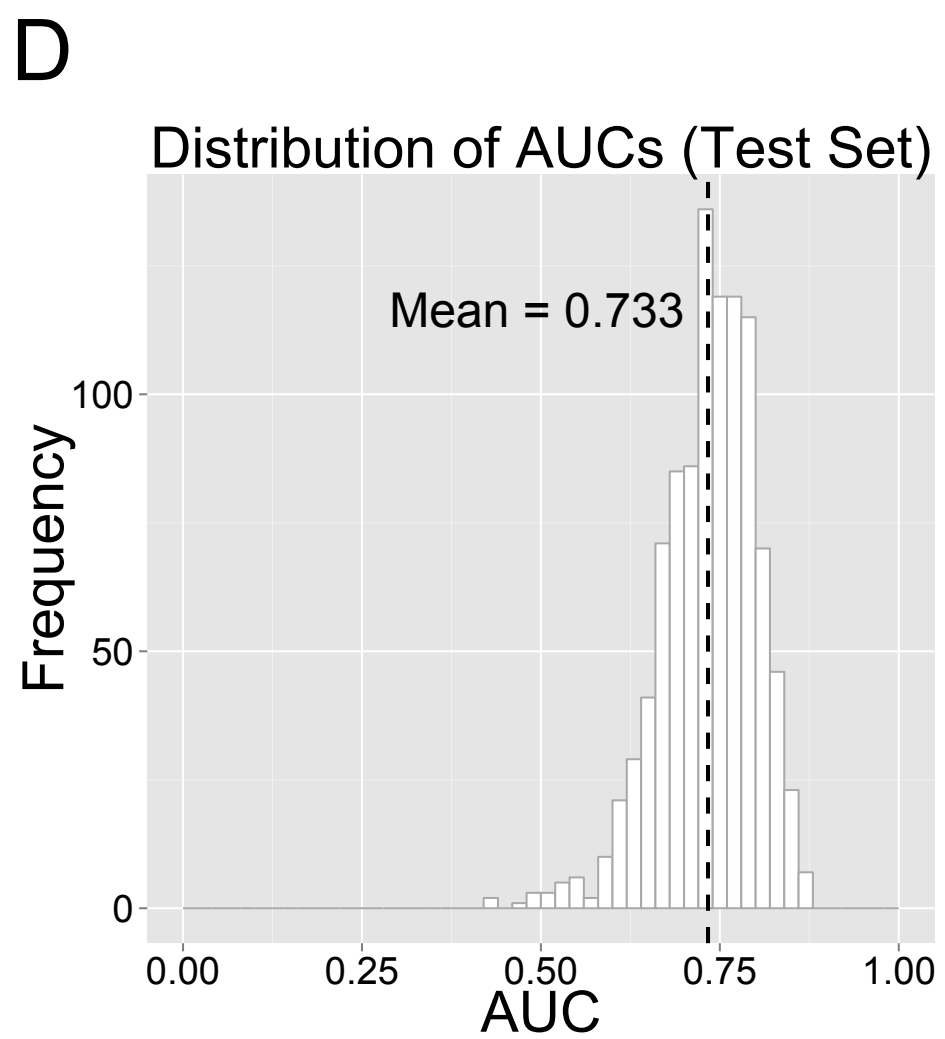

Supplement: NIHMS760424-supplement-2.pdf [file NIHMS760424-supplement-2.pdf]

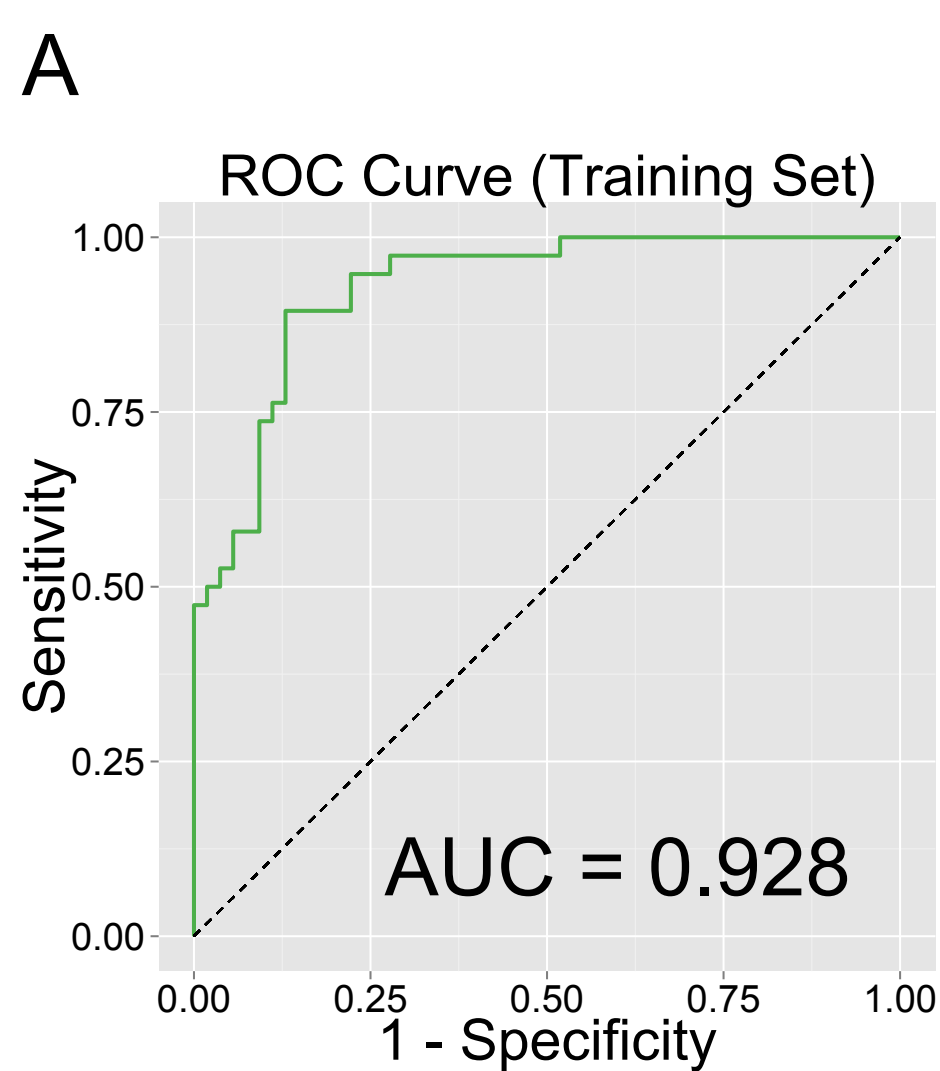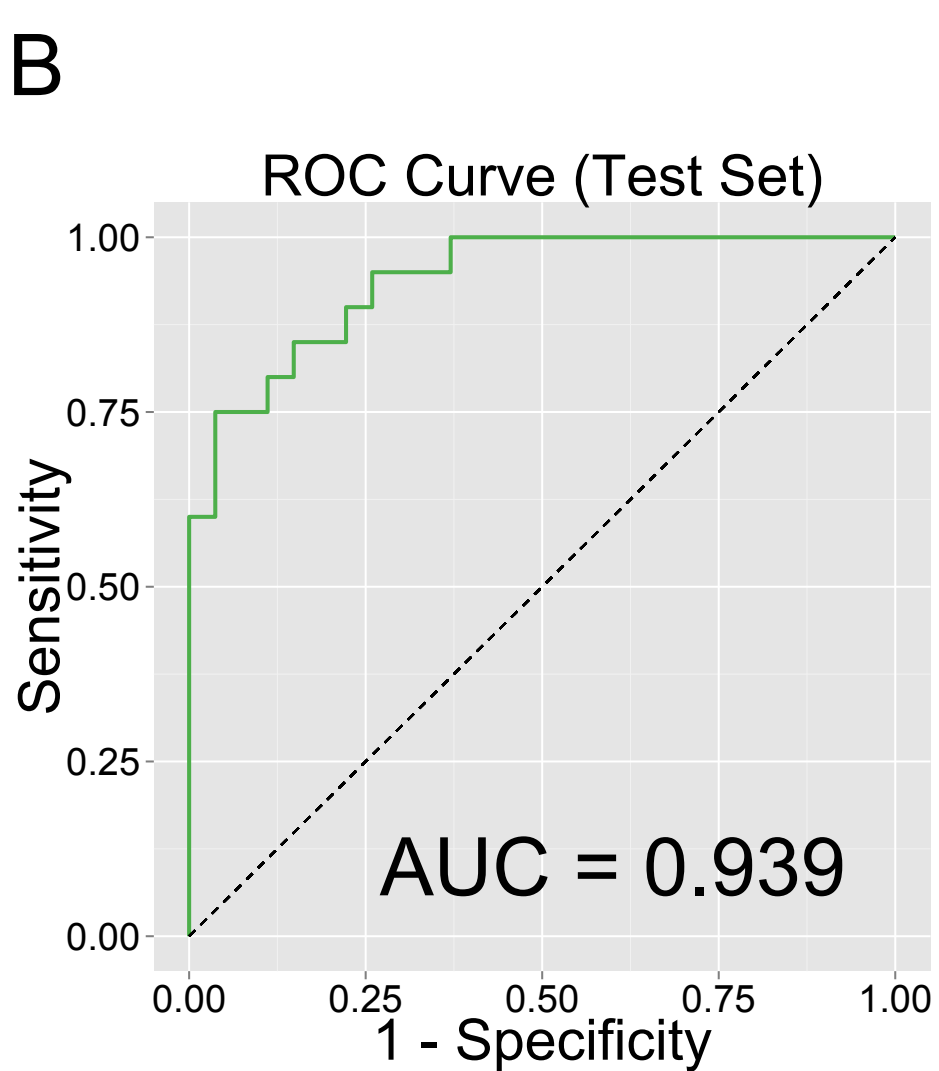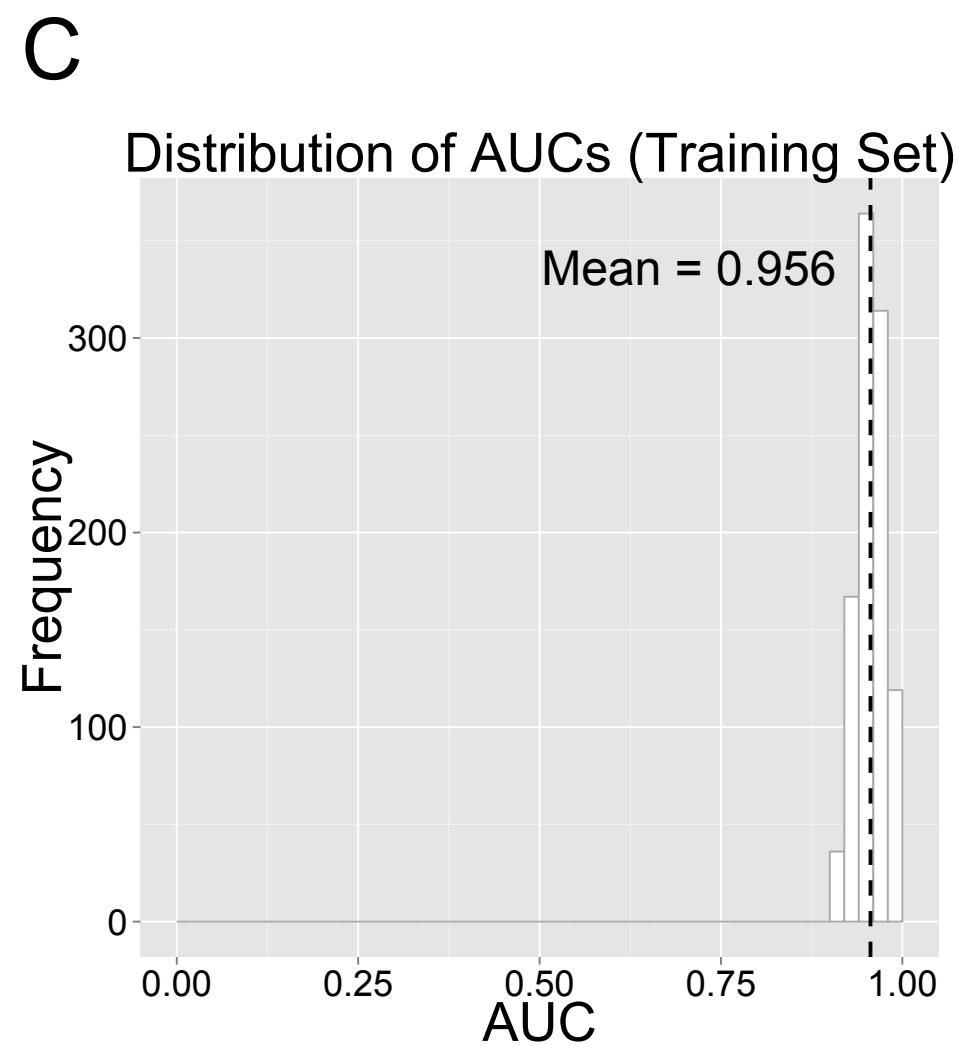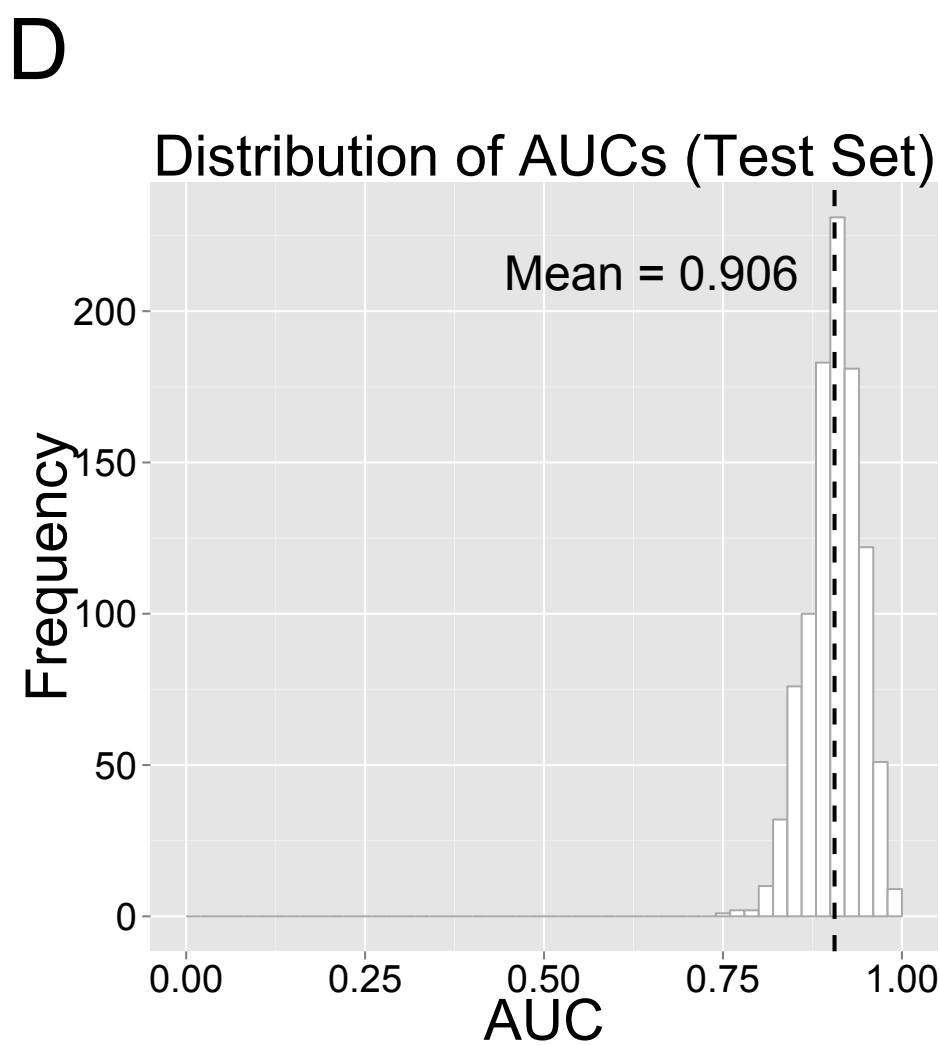

Supplement: NIHMS760424-supplement-3.pdf [file NIHMS760424-supplement-3.pdf]

# Predicting Heroin/Amphetamine/Poly DSM-IV dependence

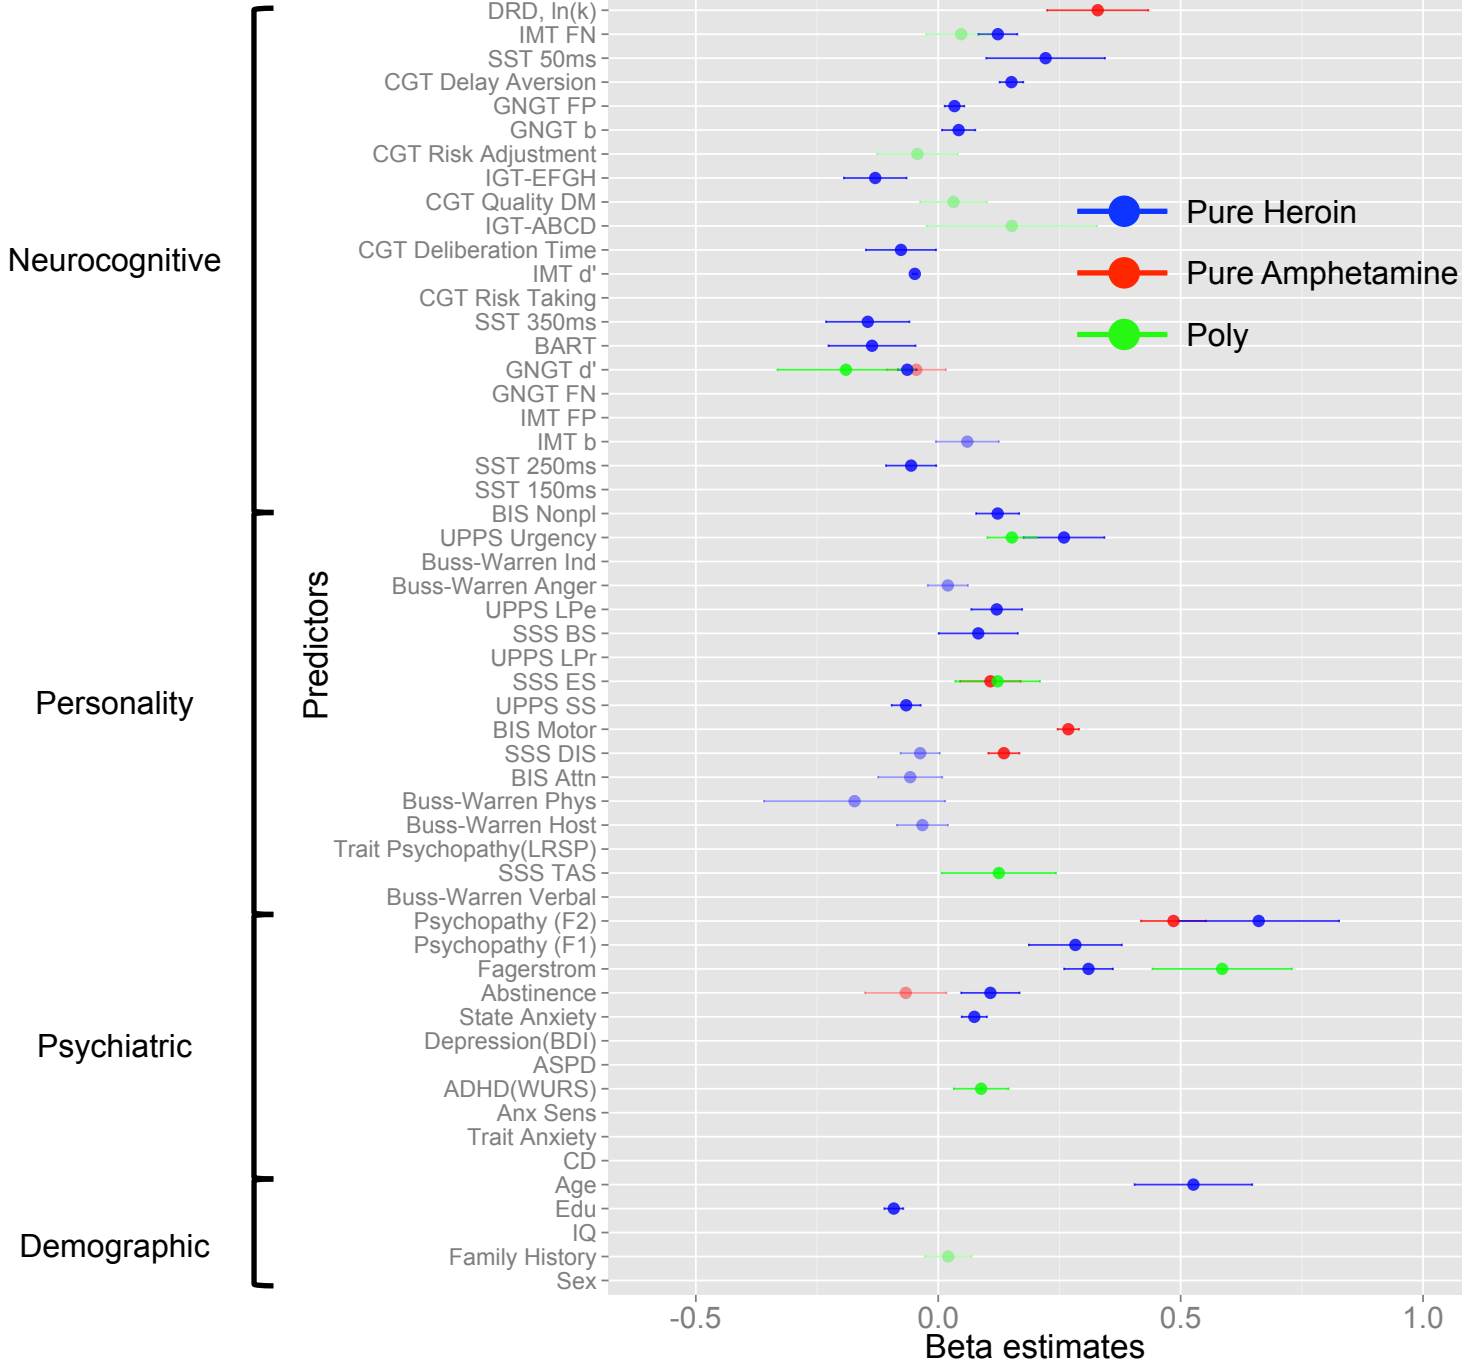

Supplement: NIHMS760424-supplement-4.pdf [file NIHMS760424-supplement-4.pdf]

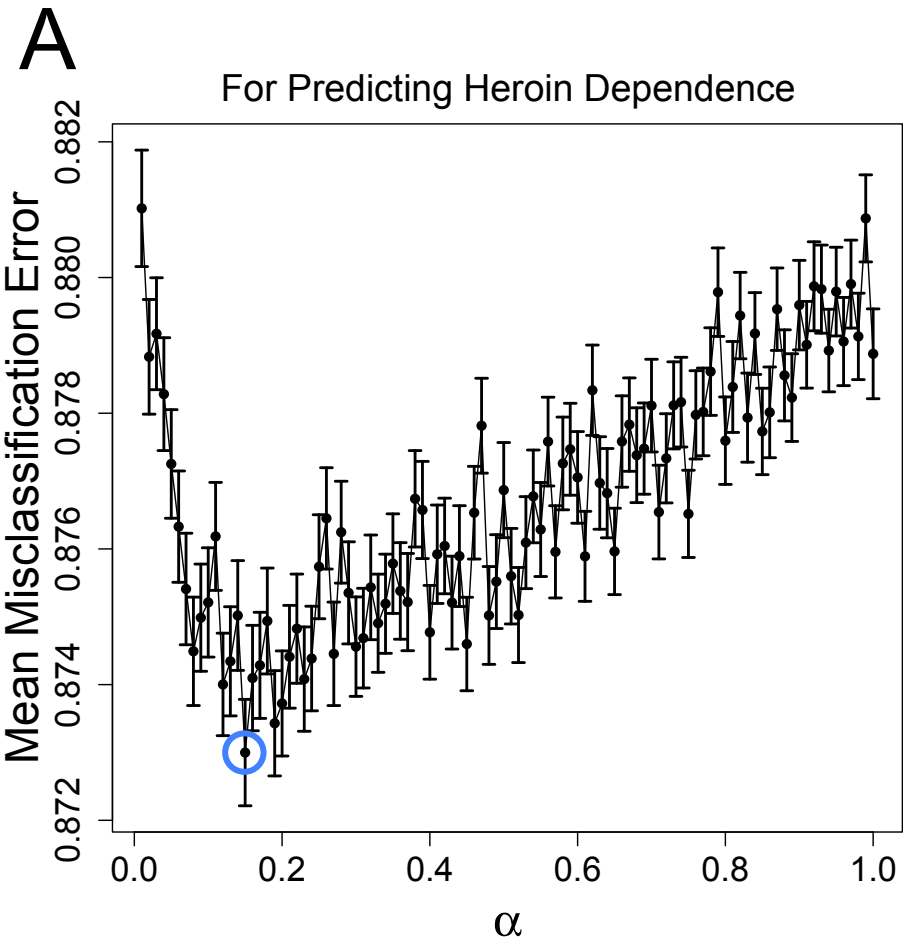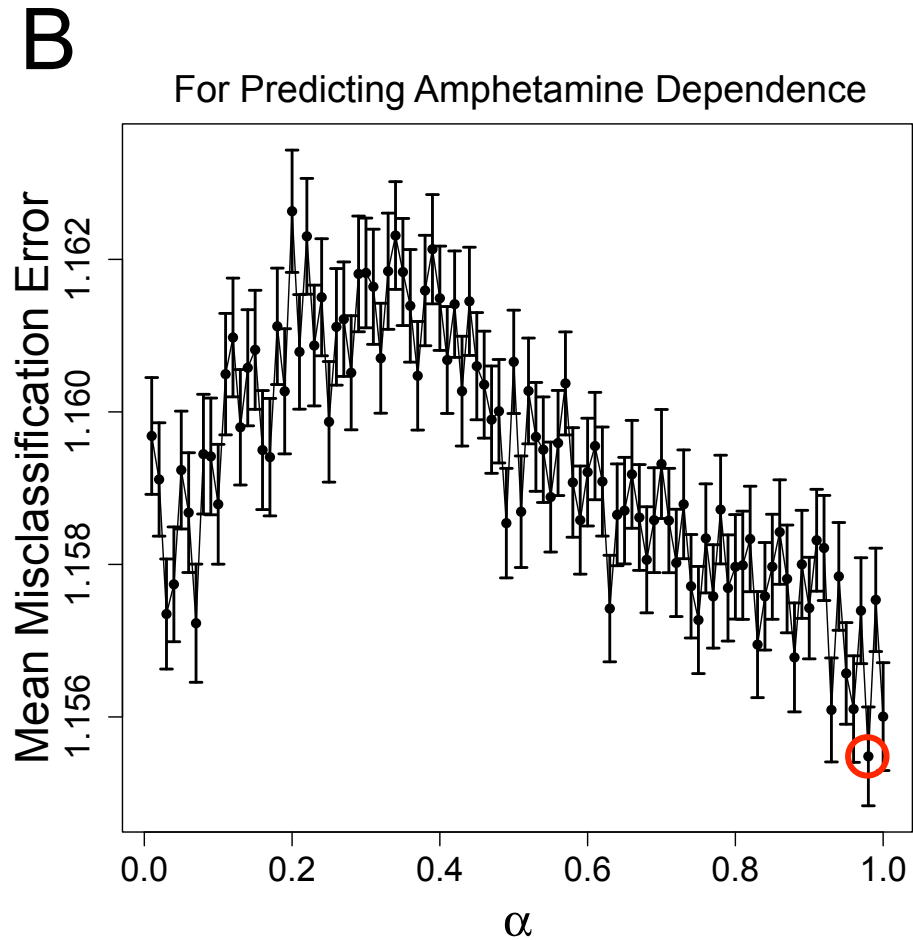

Supplement: NIHMS760424-supplement-5.pdf [file NIHMS760424-supplement-5.pdf]

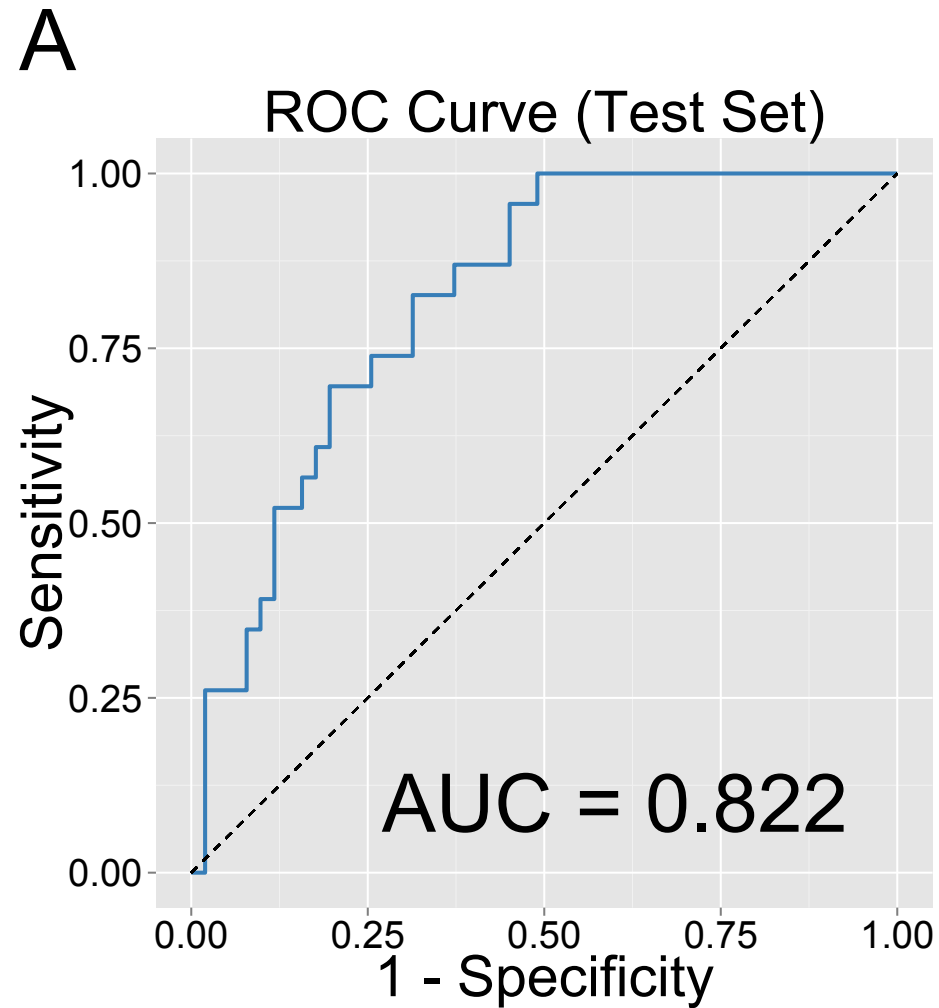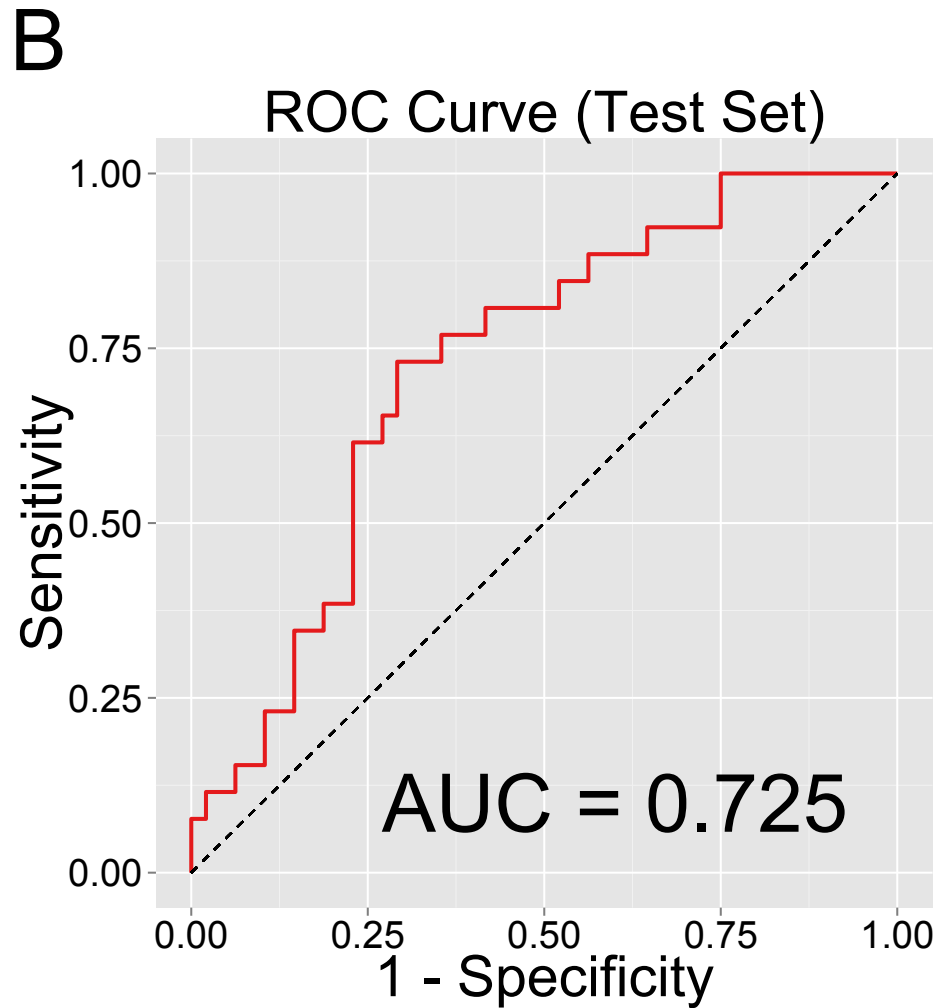

Supplement: NIHMS760424-supplement-6.pdf [file NIHMS760424-supplement-6.pdf]
